# Supplementary material
Source: PubMed Central journal article supplement (PMC3800273)
Supplement: NIHMS506068-supplement-01.pdf [file NIHMS506068-supplement-01.pdf]

Table 1. Summary of retroviral vector-treated MPS VII dogs. Eleven dogs were analyzed with echocardiography for this study. The animal number, name, gender as male (M) or female (F), date of birth, date of death if it has occurred, age of death, and serum GUSB activity are shown. Animals are organized from the longest surviving to the youngest surviving in years. In general, the animals that received echocardiograms at a particular age include all surviving animals that reached that age.

| Number  | Treatment | Total Number | Number of Females | Number of Male | Age of analysis (Years) | Serum GUSB (U/ml) | Percent Normal Serum GUSB |
|---------|-----------|--------------|-------------------|----------------|-------------------------|-------------------|---------------------------|
| Normal  | None      | 18           | 9 (50%)           | 9 (50%)        | 0.5                     | 265               | 100.0%                    |
| Normal  | None      | 11           | 6 (55%)           | 5 (45%)        | 1.0                     | 265               | 100.0%                    |
| Normal  | None      | 7            | 6 (88%)           | 1 (12%)        | 3.7                     | 265               | 100.0%                    |
| Normal  | None      | 8            | 8 (100%)          | 0 (0%)         | 7.6                     | 265               | 100.0%                    |
| MPS VII | None      | 16           | 7 (44%)           | 9 (56%)        | 0.5                     | <1                | <0.4%                     |
| MPS VII | None      | 13           | 7 (54%)           | 6 (46%)        | 1.0                     | <1                | <0.4%                     |
| MPS VII | None      | 5            | 1 (20%)           | 4 (80%)        | 1.9                     | <1                | <0.4%                     |

**MPS VII dogs that were treated with neonatal gene therapy with a gamma RV**

| Number             | Treatment | Gender | Date of Birth | Date of Death | Age of Death (Years) | Serum GUSB (U/ml) | Percent Normal Serum GUSB | Clinical Symptoms at Death |
|--------------------|-----------|--------|---------------|---------------|----------------------|-------------------|---------------------------|----------------------------|
| M1287              | HGF/RV    | M      | 12/5/2000     | 12/6/2011     | 11.0                 | 16935             | 6390.6%                   | Poor gait                  |
| M1332              | RV        | F      | 2/25/2001     | 12/9/2010     | 9.8                  | 108               | 40.8%                     | Poor gait                  |
| M1337              | RV        | F      | 2/25/2001     | 6/15/2009     | 8.3                  | 278               | 104.8%                    | Non-healing cellulitis     |
| M1328              | RV        | M      | 2/24/2001     | 10/31/2008    | 7.7                  | 482               | 181.8%                    | Poor gait                  |
| M2165              | RV        | M      | 10/17/2005    | 12/6/2011     | 6.1                  | 4368              | 1648.3%                   | Poor gait                  |
| M1653              | RV        | F      | 12/8/2002     | 3/30/2007     | 4.3                  | 88                | 33.1%                     | Collection of tissues      |
| M2421              | RV        | M      | 9/17/2008     | Still alive   | >4.0                 | 895               | 337.9%                    | Still alive                |
| M2065              | RV        | M      | 3/23/2005     | 3/29/2007     | 2.0                  | 2090              | 788.5%                    | Collection of tissues      |
| M2420              | RV        | M      | 9/17/2008     | 4/22/2009     | 0.6                  | 295               | 111.3%                    | Collection of tissues      |
| M2428              | RV        | M      | 9/28/2008     | 4/23/2009     | 0.6                  | 762               | 287.6%                    | Collection of tissues      |
| M2427              | RV        | M      | 9/28/2008     | 4/22/2009     | 0.6                  | 1247              | 470.4%                    | Collection of tissues      |
| Average            |           |        |               |               |                      | 2504              | 945.0%                    |                            |
| Standard Deviation |           |        |               |               |                      | 4946              | 1866.3%                   |                            |
| N                  |           |        |               |               |                      | 11                | 11                        |                            |
